# Supplementary material for: Network analysis of miRNA targeting m6A-related genes in patients with esophageal cancer
Source: PeerJ. 2021 Jul 29;9:e11893. doi: 10.7717/peerj.11893 (PMC8325912; doi:10.7717/peerj.11893)
Supplement: Supplemental Information 2 [file peerj-09-11893-s002.xlsx]

## Sheet: figure6
A					B
NO.	HEEC	KYSE30	TE-1				KYSE30			TE-1
1	1	2.635	2.148		NO.	sh-NC	sh-HNRNPC#1	sh-HNRNPC#2	sh-NC	sh-HNRNPC#1	sh-HNRNPC#2
2	0.952	2.041	1.921		1	0.907	0.282	0.482	0.891	0.238	0.438
3	1.052	2.263	1.742		2	1.173	0.192	0.392	1.19	0.169	0.299
					3	1.002	0.325	0.425	1.01	0.329	0.379
C	24h				48h				72h
NO.	sh-NC	sh-HNRNPC#1	sh-HNRNPC#2	NO.	sh-NC	sh-HNRNPC#1	sh-HNRNPC#2	NO.	sh-NC	sh-HNRNPC#1	sh-HNRNPC#2
1	0.186	0.238	0.183	1	0.613	0.343	0.498	1	0.878	0.658	0.722
2	0.285	0.178	0.264	2	0.717	0.443	0.462	2	0.948	0.658	0.689
3	0.252	0.22	0.279	3	0.644	0.417	0.427	3	0.95	0.554	0.757
D	24h				48h				72h
NO.	sh-NC	sh-HNRNPC#1	sh-HNRNPC#2	NO.	sh-NC	sh-HNRNPC#1	sh-HNRNPC#2	NO.	sh-NC	sh-HNRNPC#1	sh-HNRNPC#2
1	0.173	0.219	0.189	1	0.513	0.213	0.41	1	0.818	0.483	0.681
2	0.264	0.168	0.241	2	0.647	0.363	0.389	2	0.896	0.581	0.511
3	0.236	0.211	0.256	3	0.524	0.382	0.372	3	0.901	0.516	0.697
E	Migration			Invasion
NO.	sh-NC	sh-HNRNPC#1	sh-HNRNPC#2	sh-NC	sh-HNRNPC#1	sh-HNRNPC#2
1	174	72	100	173	69	95
2	163	61	91	157	84	112
3	182	80	82	165	93	101
F	Migration			Invasion
NO.	sh-NC	sh-HNRNPC#1	sh-HNRNPC#2	sh-NC	sh-HNRNPC#1	sh-HNRNPC#2
1	178	42	83	152	50	73
2	197	49	71	140	39	67
3	183	58	62	163	32	84

## Sheet: figure7
A	miR-186					miR-320c					miR-320d					miR-320b
NO.	HEEC	KYSE30	TE-1		NO.	HEEC	KYSE30	TE-1		NO.	HEEC	KYSE30	TE-1		NO.	HEEC	KYSE30	TE-1
1	1	0.225	0.512		1	1	2.65	1.183		1	1	0.93	1.035		1	1.03	0.853	1.201
2	0.864	0.277	0.478		2	1.1	2.526	1.074		2	0.989	1.047	1.11		2	1.136	1.069	1.004
3	1.028	0.222	0.628		3	1.009	2.099	1.109		3	1.055	1.178	1.164		3	0.834	0.991	1.037
B	HNRNPC-WT					HNRNPC-MUT
NO.	mimic-NC	miR-186 mimic			NO.	mimic-NC	miR-186 mimic
1	1.034	0.182			1	0.931	0.859
2	0.862	0.308			2	1.127	1.01
3	1.105	0.245			3	0.897	0.999
C	KYSE30			D	TE-1
NO.	mimic-NC	miR-186 mimic		NO.	mimic-NC	miR-186 mimic
1	1.112	0.395		1	1.051	0.247
2	0.723	0.302		2	0.861	0.369
3	1.165	0.308		3	1.174	0.302
