# Supplementary material for: Network analysis of miRNA targeting m6A-related genes in patients with esophageal cancer
Source: PeerJ journal article supplement (doi:10.7717/peerj.11893), 2021-07-29
Supplement: Supplemental_Materials.zip [file Supplemental_Materials.zip]

#please cite:
#Zhou KR, Liu S, Cai L, Bin L, et al. ENCORI: The Encyclopedia of RNA Interactomes.
#2.Li JH, et al.starBase v2.0: decoding miRNA-ceRNA, miRNA-ncRNA and protein-RNA interaction networks from large-scale CLIP-Seq data , Nucleic Acids Res. 2014 Jan;42:D92-7.
miRNAid	miRNAname	geneID	geneName	geneType	chromosome	narrowStart	narrowEnd	broadStart	broadEnd	strand	clipExpNum	degraExpNum	RBP	PITA	RNA22	miRmap	microT	miRanda	PicTar	TargetScan	pancancerNum
MIMAT0000062	hsa-let-7a-5p	ENSG00000092199	HNRNPC	protein_coding	chr14	21678005	21678010	21678005	21678010	-	5	0	AGO1-4,AGO2	1	0	1	0	0	0	0	6
MIMAT0000062	hsa-let-7a-5p	ENSG00000092199	HNRNPC	protein_coding	chr14	21678234	21678239	21678234	21678239	-	6	0	AGO1,AGO1-4,AGO2	1	0	1	0	0	0	0	6
MIMAT0000062	hsa-let-7a-5p	ENSG00000092199	HNRNPC	protein_coding	chr14	21679133	21679138	21679132	21679153	-	11	0	AGO1,AGO1-4,AGO2	1	0	1	0	1	0	0	6
MIMAT0000062	hsa-let-7a-5p	ENSG00000092199	HNRNPC	protein_coding	chr14	21681238	21681259	21681238	21681259	-	8	6	AGO1,AGO1-4,AGO2	0	1	0	0	0	0	0	6
MIMAT0000063	hsa-let-7b-5p	ENSG00000092199	HNRNPC	protein_coding	chr14	21678005	21678010	21678005	21678010	-	5	0	AGO1-4,AGO2	1	0	1	0	0	0	0	7
MIMAT0000063	hsa-let-7b-5p	ENSG00000092199	HNRNPC	protein_coding	chr14	21678234	21678239	21678234	21678239	-	6	0	AGO1,AGO1-4,AGO2	1	0	1	0	0	0	0	7
MIMAT0000063	hsa-let-7b-5p	ENSG00000092199	HNRNPC	protein_coding	chr14	21679133	21679138	21679132	21679153	-	11	0	AGO1,AGO1-4,AGO2	1	0	1	0	1	0	0	7
MIMAT0000063	hsa-let-7b-5p	ENSG00000092199	HNRNPC	protein_coding	chr14	21681241	21681262	21681241	21681262	-	8	6	AGO1,AGO1-4,AGO2	0	1	0	0	0	0	0	7
MIMAT0000064	hsa-let-7c-5p	ENSG00000092199	HNRNPC	protein_coding	chr14	21678005	21678010	21678005	21678010	-	5	0	AGO1-4,AGO2	1	0	1	0	0	0	0	10
MIMAT0000064	hsa-let-7c-5p	ENSG00000092199	HNRNPC	protein_coding	chr14	21678234	21678239	21678234	21678239	-	6	0	AGO1,AGO1-4,AGO2	1	0	1	0	0	0	0	10
MIMAT0000064	hsa-let-7c-5p	ENSG00000092199	HNRNPC	protein_coding	chr14	21679133	21679138	21679132	21679154	-	11	0	AGO1,AGO1-4,AGO2	1	0	1	0	1	0	0	10
MIMAT0000065	hsa-let-7d-5p	ENSG00000092199	HNRNPC	protein_coding	chr14	21678005	21678010	21678004	21678032	-	6	0	AGO1-4,AGO2	1	0	1	1	0	0	0	5
MIMAT0000065	hsa-let-7d-5p	ENSG00000092199	HNRNPC	protein_coding	chr14	21678234	21678239	21678233	21678261	-	6	0	AGO1,AGO1-4,AGO2	1	0	1	1	0	0	0	5
MIMAT0000065	hsa-let-7d-5p	ENSG00000092199	HNRNPC	protein_coding	chr14	21679133	21679138	21679132	21679160	-	11	0	AGO1,AGO1-4,AGO2	1	0	1	1	1	0	0	5
MIMAT0000065	hsa-let-7d-5p	ENSG00000092199	HNRNPC	protein_coding	chr14	21681241	21681260	21681241	21681260	-	8	6	AGO1,AGO1-4,AGO2	0	1	0	0	0	0	0	5
MIMAT0000066	hsa-let-7e-5p	ENSG00000092199	HNRNPC	protein_coding	chr14	21678005	21678010	21678005	21678010	-	5	0	AGO1-4,AGO2	1	0	1	0	0	0	0	7
MIMAT0000066	hsa-let-7e-5p	ENSG00000092199	HNRNPC	protein_coding	chr14	21678234	21678239	21678234	21678239	-	6	0	AGO1,AGO1-4,AGO2	1	0	1	0	0	0	0	7
MIMAT0000066	hsa-let-7e-5p	ENSG00000092199	HNRNPC	protein_coding	chr14	21679133	21679138	21679132	21679153	-	11	0	AGO1,AGO1-4,AGO2	1	0	1	0	1	0	0	7
MIMAT0000066	hsa-let-7e-5p	ENSG00000092199	HNRNPC	protein_coding	chr14	21681238	21681259	21681238	21681259	-	8	6	AGO1,AGO1-4,AGO2	0	1	0	0	0	0	0	7
MIMAT0000067	hsa-let-7f-5p	ENSG00000092199	HNRNPC	protein_coding	chr14	21678005	21678010	21678005	21678010	-	5	0	AGO1-4,AGO2	1	0	1	0	0	0	0	7
MIMAT0000067	hsa-let-7f-5p	ENSG00000092199	HNRNPC	protein_coding	chr14	21678234	21678239	21678234	21678239	-	6	0	AGO1,AGO1-4,AGO2	1	0	1	0	0	0	0	7
MIMAT0000067	hsa-let-7f-5p	ENSG00000092199	HNRNPC	protein_coding	chr14	21679133	21679138	21679132	21679153	-	11	0	AGO1,AGO1-4,AGO2	1	0	1	0	1	0	0	7
MIMAT0000077	hsa-miR-22-3p	ENSG00000092199	HNRNPC	protein_coding	chr14	21678967	21678972	21678967	21678972	-	2	0	AGO1-4,AGO2	1	0	0	0	0	0	0	19
MIMAT0000078	hsa-miR-23a-3p	ENSG00000092199	HNRNPC	protein_coding	chr14	21677652	21677657	21677652	21677657	-	3	0	AGO1-4,AGO2	1	0	0	0	0	0	0	6
MIMAT0000082	hsa-miR-26a-5p	ENSG00000092199	HNRNPC	protein_coding	chr14	21677672	21677677	21677672	21677677	-	2	0	AGO2	1	0	0	0	0	0	0	7
MIMAT0000083	hsa-miR-26b-5p	ENSG00000092199	HNRNPC	protein_coding	chr14	21677672	21677677	21677672	21677677	-	2	0	AGO2	1	0	0	0	0	0	0	7
MIMAT0000084	hsa-miR-27a-3p	ENSG00000092199	HNRNPC	protein_coding	chr14	21677430	21677435	21677430	21677435	-	2	0	AGO2	1	0	0	0	0	0	0	7
MIMAT0000085	hsa-miR-28-5p	ENSG00000092199	HNRNPC	protein_coding	chr14	21679186	21679191	21679185	21679207	-	18	0	AGO1,AGO1-4,AGO2	1	0	0	0	1	0	1	11
MIMAT0000087	hsa-miR-30a-5p	ENSG00000092199	HNRNPC	protein_coding	chr14	21678668	21678674	21678667	21678689	-	7	0	AGO1,AGO2	1	0	0	0	1	0	1	13
MIMAT0000091	hsa-miR-33a-5p	ENSG00000092199	HNRNPC	protein_coding	chr14	21678622	21678627	21678622	21678627	-	1	0	AGO2	1	0	0	0	0	0	0	4
MIMAT0000091	hsa-miR-33a-5p	ENSG00000092199	HNRNPC	protein_coding	chr14	21678857	21678862	21678857	21678862	-	1	0	AGO1-4	1	0	0	0	0	0	0	4
MIMAT0000096	hsa-miR-98-5p	ENSG00000092199	HNRNPC	protein_coding	chr14	21678005	21678010	21678005	21678010	-	5	0	AGO1-4,AGO2	1	0	1	0	0	0	0	6
MIMAT0000096	hsa-miR-98-5p	ENSG00000092199	HNRNPC	protein_coding	chr14	21678234	21678239	21678234	21678239	-	6	0	AGO1,AGO1-4,AGO2	1	0	1	0	0	0	0	6
MIMAT0000096	hsa-miR-98-5p	ENSG00000092199	HNRNPC	protein_coding	chr14	21679133	21679138	21679132	21679154	-	11	0	AGO1,AGO1-4,AGO2	1	0	1	0	1	0	0	6
MIMAT0000099	hsa-miR-101-3p	ENSG00000092199	HNRNPC	protein_coding	chr14	21678797	21678802	21678797	21678802	-	1	0	AGO1-4	1	0	0	0	0	0	0	9
MIMAT0000102	hsa-miR-105-5p	ENSG00000092199	HNRNPC	protein_coding	chr14	21677980	21677985	21677980	21677985	-	5	0	AGO1-4,AGO2	1	0	0	0	0	0	0	3
MIMAT0000227	hsa-miR-197-3p	ENSG00000092199	HNRNPC	protein_coding	chr14	21678011	21678016	21678011	21678016	-	5	0	AGO1-4,AGO2	1	0	0	0	0	0	0	3
MIMAT0000231	hsa-miR-199a-5p	ENSG00000092199	HNRNPC	protein_coding	chr14	21677866	21677871	21677866	21677871	-	1	0	AGO2	1	0	0	0	0	0	0	14
MIMAT0000241	hsa-miR-208a-3p	ENSG00000092199	HNRNPC	protein_coding	chr14	21678824	21678829	21678823	21678844	-	1	0	AGO1-4	1	0	1	0	1	1	1	3
MIMAT0000241	hsa-miR-208a-3p	ENSG00000092199	HNRNPC	protein_coding	chr14	21679166	21679171	21679165	21679187	-	14	0	AGO1,AGO1-4,AGO2	1	0	1	0	1	0	0	3
MIMAT0000242	hsa-miR-129-5p	ENSG00000092199	HNRNPC	protein_coding	chr14	21677686	21677691	21677685	21677713	-	2	0	AGO2	1	0	0	1	0	0	0	4
MIMAT0000242	hsa-miR-129-5p	ENSG00000092199	HNRNPC	protein_coding	chr14	21678354	21678359	21678353	21678381	-	3	0	AGO1-4,AGO2	1	0	0	1	0	0	0	4
MIMAT0000243	hsa-miR-148a-3p	ENSG00000092199	HNRNPC	protein_coding	chr14	21677867	21677872	21677867	21677872	-	1	0	AGO2	1	0	0	0	0	0	0	9
MIMAT0000244	hsa-miR-30c-5p	ENSG00000092199	HNRNPC	protein_coding	chr14	21678668	21678674	21678667	21678690	-	7	0	AGO1,AGO2	1	0	0	0	1	0	1	12
MIMAT0000245	hsa-miR-30d-5p	ENSG00000092199	HNRNPC	protein_coding	chr14	21678668	21678674	21678667	21678688	-	7	0	AGO1,AGO2	1	0	0	0	1	0	1	6
MIMAT0000250	hsa-miR-139-5p	ENSG00000092199	HNRNPC	protein_coding	chr14	21677467	21677474	21677467	21677474	-	1	0	AGO2	1	0	0	0	0	0	0	14
MIMAT0000251	hsa-miR-147a	ENSG00000092199	HNRNPC	protein_coding	chr14	21677918	21677923	21677918	21677923	-	8	0	AGO1,AGO1-4,AGO2	1	0	0	0	0	0	0	1
MIMAT0000255	hsa-miR-34a-5p	ENSG00000092199	HNRNPC	protein_coding	chr14	21678182	21678187	21678182	21678187	-	10	0	AGO1,AGO1-4,AGO2	1	0	0	0	0	0	0	15
MIMAT0000256	hsa-miR-181a-5p	ENSG00000092199	HNRNPC	protein_coding	chr14	21678152	21678157	21678152	21678157	-	13	0	AGO1,AGO1-4,AGO2	1	0	0	0	0	0	0	7
MIMAT0000257	hsa-miR-181b-5p	ENSG00000092199	HNRNPC	protein_coding	chr14	21678152	21678157	21678152	21678157	-	13	0	AGO1,AGO1-4,AGO2	1	0	0	0	0	0	0	5
MIMAT0000258	hsa-miR-181c-5p	ENSG00000092199	HNRNPC	protein_coding	chr14	21678152	21678157	21678152	21678157	-	13	0	AGO1,AGO1-4,AGO2	1	0	0	0	0	0	0	7
MIMAT0000263	hsa-miR-199b-5p	ENSG00000092199	HNRNPC	protein_coding	chr14	21677866	21677871	21677866	21677871	-	1	0	AGO2	1	0	0	0	0	0	0	14
MIMAT0000269	hsa-miR-212-3p	ENSG00000092199	HNRNPC	protein_coding	chr14	21679267	21679272	21679267	21679272	-	25	0	AGO1,AGO1-4,AGO2	1	0	0	0	0	0	0	4
MIMAT0000275	hsa-miR-218-5p	ENSG00000092199	HNRNPC	protein_coding	chr14	21679278	21679283	21679278	21679283	-	24	1	AGO1,AGO1-4,AGO2	1	0	1	0	0	0	0	9
MIMAT0000275	hsa-miR-218-5p	ENSG00000092199	HNRNPC	protein_coding	chr14	21679377	21679383	21679376	21679396	-	10	0	AGO1-4,AGO2	0	0	1	0	1	0	1	9
MIMAT0000276	hsa-miR-219a-5p	ENSG00000092199	HNRNPC	protein_coding	chr14	21677494	21677499	21677494	21677499	-	1	0	AGO2	1	0	0	0	0	0	0	4
MIMAT0000281	hsa-miR-224-5p	ENSG00000092199	HNRNPC	protein_coding	chr14	21679123	21679128	21679122	21679142	-	12	0	AGO1,AGO1-4,AGO2	1	0	0	0	1	0	1	11
MIMAT0000318	hsa-miR-200b-3p	ENSG00000092199	HNRNPC	protein_coding	chr14	21677379	21677384	21677379	21677384	-	1	0	AGO1	1	0	0	0	0	0	0	6
MIMAT0000414	hsa-let-7g-5p	ENSG00000092199	HNRNPC	protein_coding	chr14	21678005	21678010	21678005	21678010	-	5	0	AGO1-4,AGO2	1	0	1	0	0	0	0	9
MIMAT0000414	hsa-let-7g-5p	ENSG00000092199	HNRNPC	protein_coding	chr14	21678234	21678239	21678234	21678239	-	6	0	AGO1,AGO1-4,AGO2	1	0	1	0	0	0	0	9
MIMAT0000414	hsa-let-7g-5p	ENSG00000092199	HNRNPC	protein_coding	chr14	21679133	21679138	21679132	21679153	-	11	0	AGO1,AGO1-4,AGO2	1	0	1	0	1	0	0	9
MIMAT0000415	hsa-let-7i-5p	ENSG00000092199	HNRNPC	protein_coding	chr14	21678005	21678010	21678005	21678010	-	5	0	AGO1-4,AGO2	1	0	1	0	0	0	0	6
MIMAT0000415	hsa-let-7i-5p	ENSG00000092199	HNRNPC	protein_coding	chr14	21678234	21678239	21678234	21678239	-	6	0	AGO1,AGO1-4,AGO2	1	0	1	0	0	0	0	6
MIMAT0000415	hsa-let-7i-5p	ENSG00000092199	HNRNPC	protein_coding	chr14	21679133	21679138	21679132	21679153	-	11	0	AGO1,AGO1-4,AGO2	1	0	1	0	1	0	0	6
MIMAT0000418	hsa-miR-23b-3p	ENSG00000092199	HNRNPC	protein_coding	chr14	21677652	21677657	21677652	21677657	-	3	0	AGO1-4,AGO2	1	0	0	0	0	0	0	9
MIMAT0000419	hsa-miR-27b-3p	ENSG00000092199	HNRNPC	protein_coding	chr14	21677430	21677435	21677430	21677435	-	2	0	AGO2	1	0	0	0	0	0	0	9
MIMAT0000420	hsa-miR-30b-5p	ENSG00000092199	HNRNPC	protein_coding	chr14	21678668	21678674	21678667	21678690	-	7	0	AGO1,AGO2	1	0	0	0	1	0	1	12
MIMAT0000422	hsa-miR-124-3p	ENSG00000092199	HNRNPC	protein_coding	chr14	21678180	21678185	21678180	21678185	-	10	0	AGO1,AGO1-4,AGO2	1	0	0	0	0	0	0	2
MIMAT0000422	hsa-miR-124-3p	ENSG00000092199	HNRNPC	protein_coding	chr14	21678446	21678451	21678446	21678451	-	2	0	AGO1-4,AGO2	1	0	0	0	0	0	0	2
MIMAT0000424	hsa-miR-128-3p	ENSG00000092199	HNRNPC	protein_coding	chr14	21678796	21678801	21678795	21678817	-	2	0	AGO1-4	1	0	0	0	1	0	0	1
MIMAT0000426	hsa-miR-132-3p	ENSG00000092199	HNRNPC	protein_coding	chr14	21679267	21679272	21679267	21679272	-	25	0	AGO1,AGO1-4,AGO2	1	0	0	0	0	0	0	3
MIMAT0000432	hsa-miR-141-3p	ENSG00000092199	HNRNPC	protein_coding	chr14	21678016	21678022	21678015	21678039	-	6	0	AGO1-4,AGO2	1	0	0	0	1	0	0	10
MIMAT0000432	hsa-miR-141-3p	ENSG00000092199	HNRNPC	protein_coding	chr14	21678833	21678838	21678832	21678853	-	1	0	AGO1-4	1	0	0	0	1	0	0	10
MIMAT0000433	hsa-miR-142-5p	ENSG00000092199	HNRNPC	protein_coding	chr14	21678082	21678088	21678082	21678088	-	8	0	AGO1,AGO1-4,AGO2	1	0	0	0	0	0	0	6
MIMAT0000433	hsa-miR-142-5p	ENSG00000092199	HNRNPC	protein_coding	chr14	21679128	21679133	21679128	21679133	-	11	0	AGO1,AGO1-4,AGO2	1	0	0	0	0	0	0	6
MIMAT0000434	hsa-miR-142-3p	ENSG00000092199	HNRNPC	protein_coding	chr14	21678568	21678574	21678567	21678589	-	4	0	AGO1,AGO2	1	0	1	0	1	0	1	7
MIMAT0000435	hsa-miR-143-3p	ENSG00000092199	HNRNPC	protein_coding	chr14	21677334	21677340	21677333	21677353	-	3	0	AGO1,AGO2	1	0	1	0	1	0	0	10
MIMAT0000436	hsa-miR-144-3p	ENSG00000092199	HNRNPC	protein_coding	chr14	21678797	21678803	21678796	21678815	-	2	0	AGO1-4	1	0	0	0	1	0	1	3
MIMAT0000437	hsa-miR-145-5p	ENSG00000092199	HNRNPC	protein_coding	chr14	21677598	21677604	21677597	21677619	-	9	0	AGO1-4,AGO2	1	0	1	0	1	0	0	17
MIMAT0000438	hsa-miR-152-3p	ENSG00000092199	HNRNPC	protein_coding	chr14	21677867	21677872	21677867	21677872	-	1	0	AGO2	1	0	0	0	0	0	0	10
MIMAT0000439	hsa-miR-153-3p	ENSG00000092199	HNRNPC	protein_coding	chr14	21677362	21677368	21677361	21677385	-	1	0	AGO1	1	0	1	0	1	0	0	5
MIMAT0000439	hsa-miR-153-3p	ENSG00000092199	HNRNPC	protein_coding	chr14	21679063	21679068	21679063	21679068	-	3	0	AGO1,AGO1-4	1	0	1	0	0	0	0	5
MIMAT0000449	hsa-miR-146a-5p	ENSG00000092199	HNRNPC	protein_coding	chr14	21679264	21679269	21679264	21679269	-	24	1	AGO1,AGO1-4,AGO2	1	0	0	0	0	0	0	7
MIMAT0000452	hsa-miR-154-5p	ENSG00000092199	HNRNPC	protein_coding	chr14	21677367	21677372	21677367	21677372	-	1	0	AGO1	1	0	0	0	0	0	0	8
MIMAT0000455	hsa-miR-185-5p	ENSG00000092199	HNRNPC	protein_coding	chr14	21677458	21677463	21677458	21677463	-	1	0	AGO2	1	0	1	0	0	0	0	9
MIMAT0000455	hsa-miR-185-5p	ENSG00000092199	HNRNPC	protein_coding	chr14	21679296	21679301	21679295	21679316	-	15	5	AGO1,AGO1-4	1	0	1	0	1	0	0	9
MIMAT0000456	hsa-miR-186-5p	ENSG00000092199	HNRNPC	protein_coding	chr14	21677708	21677713	21677708	21677713	-	2	0	AGO2	1	0	0	0	0	0	0	6
MIMAT0000456	hsa-miR-186-5p	ENSG00000092199	HNRNPC	protein_coding	chr14	21678288	21678293	21678288	21678293	-	6	0	AGO1,AGO1-4,AGO2	1	0	0	0	0	0	0	6
MIMAT0000456	hsa-miR-186-5p	ENSG00000092199	HNRNPC	protein_coding	chr14	21679047	21679054	21679046	21679067	-	3	0	AGO1,AGO1-4	1	0	0	0	1	0	0	6
MIMAT0000456	hsa-miR-186-5p	ENSG00000092199	HNRNPC	protein_coding	chr14	21679341	21679346	21679340	21679361	-	12	0	AGO1,AGO1-4,AGO2	1	0	0	0	1	0	1	6
MIMAT0000460	hsa-miR-194-5p	ENSG00000092199	HNRNPC	protein_coding	chr14	21677641	21677646	21677640	21677668	-	3	0	AGO1-4,AGO2	1	0	1	1	0	0	0	7
MIMAT0000460	hsa-miR-194-5p	ENSG00000092199	HNRNPC	protein_coding	chr14	21678149	21678154	21678148	21678176	-	15	0	AGO1,AGO1-4,AGO2	1	0	1	1	0	0	0	7
MIMAT0000460	hsa-miR-194-5p	ENSG00000092199	HNRNPC	protein_coding	chr14	21678943	21678948	21678942	21678970	-	5	0	AGO1-4,AGO2	1	0	1	1	0	0	0	7
MIMAT0000510	hsa-miR-320a	ENSG00000092199	HNRNPC	protein_coding	chr14	21678965	21678971	21678964	21678992	-	2	0	AGO1-4,AGO2	1	0	0	1	1	1	1	6
MIMAT0000617	hsa-miR-200c-3p	ENSG00000092199	HNRNPC	protein_coding	chr14	21677379	21677384	21677379	21677384	-	1	0	AGO1	1	0	0	0	0	0	0	4
MIMAT0000682	hsa-miR-200a-3p	ENSG00000092199	HNRNPC	protein_coding	chr14	21678016	21678022	21678015	21678039	-	6	0	AGO1-4,AGO2	1	0	0	0	1	0	0	8
MIMAT0000682	hsa-miR-200a-3p	ENSG00000092199	HNRNPC	protein_coding	chr14	21678833	21678838	21678832	21678853	-	1	0	AGO1-4	1	0	0	0	1	0	0	8
MIMAT0000685	hsa-miR-34b-5p	ENSG00000092199	HNRNPC	protein_coding	chr14	21678181	21678187	21678181	21678187	-	10	0	AGO1,AGO1-4,AGO2	0	0	1	0	0	0	0	5
MIMAT0000685	hsa-miR-34b-5p	ENSG00000092199	HNRNPC	protein_coding	chr14	21678447	21678452	21678447	21678452	-	2	0	AGO1-4,AGO2	0	0	1	0	0	0	0	5
MIMAT0000686	hsa-miR-34c-5p	ENSG00000092199	HNRNPC	protein_coding	chr14	21678182	21678187	21678182	21678187	-	10	0	AGO1,AGO1-4,AGO2	1	0	0	0	0	0	0	4
MIMAT0000692	hsa-miR-30e-5p	ENSG00000092199	HNRNPC	protein_coding	chr14	21678668	21678674	21678667	21678689	-	7	0	AGO1,AGO2	1	0	0	0	1	0	1	9
MIMAT0000703	hsa-miR-361-5p	ENSG00000092199	HNRNPC	protein_coding	chr14	21677315	21677320	21677314	21677335	-	2	0	AGO2	1	0	1	0	1	0	0	5
MIMAT0000703	hsa-miR-361-5p	ENSG00000092199	HNRNPC	protein_coding	chr14	21678196	21678201	21678196	21678201	-	9	0	AGO1,AGO1-4,AGO2	1	0	1	0	0	0	0	5
MIMAT0000705	hsa-miR-362-5p	ENSG00000092199	HNRNPC	protein_coding	chr14	21679108	21679113	21679107	21679135	-	12	0	AGO1,AGO1-4,AGO2	1	0	1	1	0	0	0	8
MIMAT0000705	hsa-miR-362-5p	ENSG00000092199	HNRNPC	protein_coding	chr14	21679448	21679454	21679447	21679475	-	7	4	AGO1,AGO1-4,AGO2	0	0	1	1	0	0	1	8
MIMAT0000721	hsa-miR-369-3p	ENSG00000092199	HNRNPC	protein_coding	chr14	21677542	21677547	21677541	21677569	-	2	0	AGO1-4,AGO2	1	0	0	1	0	0	0	5
MIMAT0000723	hsa-miR-371a-3p	ENSG00000092199	HNRNPC	protein_coding	chr14	21677868	21677874	21677868	21677875	-	1	0	AGO2	1	0	1	0	0	0	0	1
MIMAT0000727	hsa-miR-374a-5p	ENSG00000092199	HNRNPC	protein_coding	chr14	21678558	21678563	21678558	21678563	-	3	0	AGO2	1	0	0	0	0	0	0	3
MIMAT0000728	hsa-miR-375	ENSG00000092199	HNRNPC	protein_coding	chr14	21677508	21677513	21677508	21677513	-	1	0	AGO2	1	0	0	0	0	0	0	5
MIMAT0000732	hsa-miR-378a-3p	ENSG00000092199	HNRNPC	protein_coding	chr14	21678423	21678428	21678423	21678428	-	2	0	AGO1-4,AGO2	1	0	0	0	0	0	0	6
MIMAT0000736	hsa-miR-381-3p	ENSG00000092199	HNRNPC	protein_coding	chr14	21677703	21677708	21677703	21677708	-	2	0	AGO2	1	0	0	0	0	0	0	4
MIMAT0000736	hsa-miR-381-3p	ENSG00000092199	HNRNPC	protein_coding	chr14	21678683	21678688	21678682	21678703	-	7	0	AGO1,AGO2	1	0	0	0	1	0	0	4
MIMAT0000737	hsa-miR-382-5p	ENSG00000092199	HNRNPC	protein_coding	chr14	21678085	21678090	21678085	21678090	-	8	0	AGO1,AGO1-4,AGO2	1	0	0	0	0	0	0	6
MIMAT0000751	hsa-miR-330-3p	ENSG00000092199	HNRNPC	protein_coding	chr14	21678431	21678438	21678431	21678438	-	2	0	AGO1-4,AGO2	1	0	0	0	0	0	0	4
MIMAT0000751	hsa-miR-330-3p	ENSG00000092199	HNRNPC	protein_coding	chr14	21678964	21678969	21678963	21678969	-	2	0	AGO1-4,AGO2	1	0	0	0	0	0	1	4
MIMAT0000753	hsa-miR-342-3p	ENSG00000092199	HNRNPC	protein_coding	chr14	21677651	21677656	21677651	21677656	-	3	0	AGO1-4,AGO2	1	0	0	0	0	0	0	5
MIMAT0000754	hsa-miR-337-3p	ENSG00000092199	HNRNPC	protein_coding	chr14	21678366	21678371	21678366	21678371	-	1	0	AGO1-4	1	0	0	0	0	0	0	9
MIMAT0000759	hsa-miR-148b-3p	ENSG00000092199	HNRNPC	protein_coding	chr14	21677867	21677872	21677867	21677872	-	1	0	AGO2	1	0	0	0	0	0	0	8
MIMAT0000761	hsa-miR-324-5p	ENSG00000092199	HNRNPC	protein_coding	chr14	21677595	21677600	21677595	21677600	-	9	0	AGO1-4,AGO2	1	0	0	0	0	0	0	5
MIMAT0000762	hsa-miR-324-3p	ENSG00000092199	HNRNPC	protein_coding	chr14	21678913	21678919	21678913	21678920	-	6	0	AGO1,AGO1-4,AGO2	1	0	1	0	0	0	0	2
MIMAT0000764	hsa-miR-339-5p	ENSG00000092199	HNRNPC	protein_coding	chr14	21733163	21733184	21733163	21733184	-	1	0	AGO1-4	0	1	0	0	0	0	0	10
MIMAT0000765	hsa-miR-335-5p	ENSG00000092199	HNRNPC	protein_coding	chr14	21678976	21678982	21678975	21678999	-	1	0	AGO1-4	1	0	1	0	1	0	0	5
MIMAT0000765	hsa-miR-335-5p	ENSG00000092199	HNRNPC	protein_coding	chr14	21679070	21679075	21679069	21679091	-	4	0	AGO1,AGO1-4	1	0	1	0	1	0	0	5
MIMAT0001339	hsa-miR-422a	ENSG00000092199	HNRNPC	protein_coding	chr14	21678423	21678428	21678423	21678428	-	2	0	AGO1-4,AGO2	1	0	0	0	0	0	0	0
MIMAT0001532	hsa-miR-448	ENSG00000092199	HNRNPC	protein_coding	chr14	21679063	21679068	21679063	21679068	-	3	0	AGO1,AGO1-4	1	0	0	0	0	0	0	2
MIMAT0001536	hsa-miR-429	ENSG00000092199	HNRNPC	protein_coding	chr14	21677379	21677386	21677379	21677386	-	1	0	AGO1	1	0	0	0	0	0	0	8
MIMAT0001541	hsa-miR-449a	ENSG00000092199	HNRNPC	protein_coding	chr14	21678182	21678187	21678182	21678187	-	10	0	AGO1,AGO1-4,AGO2	1	0	0	0	0	0	0	5
MIMAT0001627	hsa-miR-433-3p	ENSG00000092199	HNRNPC	protein_coding	chr14	21678589	21678595	21678588	21678611	-	1	0	AGO1	1	0	0	0	1	0	0	7
MIMAT0001629	hsa-miR-329-3p	ENSG00000092199	HNRNPC	protein_coding	chr14	21678946	21678951	21678946	21678951	-	5	0	AGO1-4,AGO2	1	0	0	0	0	0	0	6
MIMAT0001638	hsa-miR-409-5p	ENSG00000092199	HNRNPC	protein_coding	chr14	21677368	21677373	21677368	21677373	-	1	0	AGO1	1	0	1	0	0	0	0	7
MIMAT0001638	hsa-miR-409-5p	ENSG00000092199	HNRNPC	protein_coding	chr14	21677620	21677625	21677620	21677625	-	9	0	AGO1-4,AGO2	1	0	1	0	0	0	0	7
MIMAT0002171	hsa-miR-410-3p	ENSG00000092199	HNRNPC	protein_coding	chr14	21677374	21677379	21677374	21677379	-	1	0	AGO1	1	0	0	0	0	0	0	4
MIMAT0002171	hsa-miR-410-3p	ENSG00000092199	HNRNPC	protein_coding	chr14	21678557	21678562	21678557	21678562	-	3	0	AGO2	1	0	0	0	0	0	0	4
MIMAT0002177	hsa-miR-486-5p	ENSG00000092199	HNRNPC	protein_coding	chr14	21677840	21677845	21677840	21677845	-	1	0	AGO2	1	0	0	0	0	0	0	8
MIMAT0002805	hsa-miR-489-3p	ENSG00000092199	HNRNPC	protein_coding	chr14	21678863	21678868	21678862	21678868	-	1	2	AGO1-4	1	0	0	0	0	1	1	2
MIMAT0002809	hsa-miR-146b-5p	ENSG00000092199	HNRNPC	protein_coding	chr14	21679264	21679269	21679264	21679269	-	24	1	AGO1,AGO1-4,AGO2	1	0	0	0	0	0	0	4
MIMAT0002817	hsa-miR-495-3p	ENSG00000092199	HNRNPC	protein_coding	chr14	21678292	21678297	21678291	21678319	-	6	0	AGO1,AGO1-4,AGO2	1	0	0	1	0	0	0	10
MIMAT0002817	hsa-miR-495-3p	ENSG00000092199	HNRNPC	protein_coding	chr14	21678655	21678660	21678654	21678682	-	8	0	AGO1,AGO2	1	0	0	1	0	0	0	10
MIMAT0002817	hsa-miR-495-3p	ENSG00000092199	HNRNPC	protein_coding	chr14	21678815	21678820	21678814	21678842	-	1	0	AGO1-4	1	0	0	1	1	0	0	10
MIMAT0002817	hsa-miR-495-3p	ENSG00000092199	HNRNPC	protein_coding	chr14	21679174	21679179	21679173	21679201	-	18	0	AGO1,AGO1-4,AGO2	1	0	0	1	1	0	0	10
MIMAT0002821	hsa-miR-181d-5p	ENSG00000092199	HNRNPC	protein_coding	chr14	21678152	21678157	21678152	21678157	-	13	0	AGO1,AGO1-4,AGO2	1	0	0	0	0	0	0	6
MIMAT0002824	hsa-miR-498	ENSG00000092199	HNRNPC	protein_coding	chr14	21677996	21678001	21677996	21678001	-	4	0	AGO1-4,AGO2	1	0	0	0	0	0	0	2
MIMAT0002824	hsa-miR-498	ENSG00000092199	HNRNPC	protein_coding	chr14	21678974	21678979	21678974	21678979	-	1	0	AGO1-4	1	0	0	0	0	0	0	2
MIMAT0002826	hsa-miR-515-5p	ENSG00000092199	HNRNPC	protein_coding	chr14	21678714	21678720	21678713	21678741	-	4	0	AGO1,AGO1-4,AGO2	1	0	1	1	0	0	0	1
MIMAT0002828	hsa-miR-519e-5p	ENSG00000092199	HNRNPC	protein_coding	chr14	21678714	21678720	21678713	21678741	-	4	0	AGO1,AGO1-4,AGO2	0	0	1	1	0	0	0	1
MIMAT0002831	hsa-miR-519c-5p	ENSG00000092199	HNRNPC	protein_coding	chr14	21678627	21678633	21678627	21678634	-	1	0	AGO2	1	0	1	0	0	0	0	0
MIMAT0002831	hsa-miR-519c-5p	ENSG00000092199	HNRNPC	protein_coding	chr14	21678848	21678854	21678848	21678855	-	1	0	AGO1-4	1	0	1	0	0	0	0	0
MIMAT0002835	hsa-miR-526b-5p	ENSG00000092199	HNRNPC	protein_coding	chr14	21678346	21678351	21678346	21678351	-	3	0	AGO1-4,AGO2	1	0	0	0	0	0	0	3
MIMAT0002841	hsa-miR-518f-5p	ENSG00000092199	HNRNPC	protein_coding	chr14	21678627	21678633	21678627	21678633	-	1	0	AGO2	0	0	1	0	0	0	0	1
MIMAT0002841	hsa-miR-518f-5p	ENSG00000092199	HNRNPC	protein_coding	chr14	21678848	21678854	21678848	21678854	-	1	0	AGO1-4	0	0	1	0	0	0	0	1
MIMAT0002845	hsa-miR-526a	ENSG00000092199	HNRNPC	protein_coding	chr14	21678627	21678633	21678627	21678634	-	1	0	AGO2	1	0	1	0	0	0	0	0
MIMAT0002845	hsa-miR-526a	ENSG00000092199	HNRNPC	protein_coding	chr14	21678848	21678854	21678848	21678855	-	1	0	AGO1-4	1	0	1	0	0	0	0	0
MIMAT0002849	hsa-miR-524-5p	ENSG00000092199	HNRNPC	protein_coding	chr14	21677704	21677711	21677704	21677711	-	2	0	AGO2	1	0	0	0	0	0	0	3
MIMAT0002849	hsa-miR-524-5p	ENSG00000092199	HNRNPC	protein_coding	chr14	21678684	21678689	21678684	21678689	-	6	0	AGO1,AGO2	1	0	0	0	0	0	0	3
MIMAT0002855	hsa-miR-520d-5p	ENSG00000092199	HNRNPC	protein_coding	chr14	21677704	21677711	21677704	21677711	-	2	0	AGO2	1	0	0	0	0	0	0	1
MIMAT0002855	hsa-miR-520d-5p	ENSG00000092199	HNRNPC	protein_coding	chr14	21678684	21678689	21678684	21678689	-	6	0	AGO1,AGO2	1	0	0	0	0	0	0	1
MIMAT0002858	hsa-miR-520g-3p	ENSG00000092199	HNRNPC	protein_coding	chr14	21678657	21678662	21678657	21678662	-	8	0	AGO1,AGO2	1	0	0	0	0	0	0	2
MIMAT0002867	hsa-miR-520h	ENSG00000092199	HNRNPC	protein_coding	chr14	21678657	21678662	21678657	21678662	-	8	0	AGO1,AGO2	1	0	0	0	0	0	0	0
MIMAT0002868	hsa-miR-522-3p	ENSG00000092199	HNRNPC	protein_coding	chr14	21679206	21679211	21679206	21679211	-	19	0	AGO1,AGO1-4,AGO2	1	0	0	0	0	0	0	2
MIMAT0002870	hsa-miR-499a-5p	ENSG00000092199	HNRNPC	protein_coding	chr14	21677823	21677851	21677823	21677851	-	3	0	AGO1,AGO2	0	0	0	1	0	0	0	3
MIMAT0002870	hsa-miR-499a-5p	ENSG00000092199	HNRNPC	protein_coding	chr14	21678824	21678829	21678823	21678851	-	1	0	AGO1-4	1	0	1	1	1	1	1	3
MIMAT0002870	hsa-miR-499a-5p	ENSG00000092199	HNRNPC	protein_coding	chr14	21679166	21679172	21679165	21679193	-	15	0	AGO1,AGO1-4,AGO2	1	0	1	1	1	1	1	3
MIMAT0002877	hsa-miR-513a-5p	ENSG00000092199	HNRNPC	protein_coding	chr14	21677430	21677435	21677430	21677435	-	2	0	AGO2	1	0	0	0	0	0	0	3
MIMAT0002878	hsa-miR-506-3p	ENSG00000092199	HNRNPC	protein_coding	chr14	21678180	21678185	21678180	21678185	-	10	0	AGO1,AGO1-4,AGO2	1	0	0	0	0	0	0	4
MIMAT0002878	hsa-miR-506-3p	ENSG00000092199	HNRNPC	protein_coding	chr14	21678446	21678451	21678446	21678451	-	2	0	AGO1-4,AGO2	1	0	0	0	0	0	0	4
MIMAT0002880	hsa-miR-508-3p	ENSG00000092199	HNRNPC	protein_coding	chr14	21677494	21677499	21677494	21677499	-	1	0	AGO2	1	0	0	0	0	0	0	6
MIMAT0002883	hsa-miR-514a-3p	ENSG00000092199	HNRNPC	protein_coding	chr14	21678862	21678867	21678861	21678867	-	1	2	AGO1-4	1	0	0	0	0	1	0	7
MIMAT0002890	hsa-miR-299-5p	ENSG00000092199	HNRNPC	protein_coding	chr14	21678727	21678732	21678726	21678732	-	3	0	AGO1,AGO1-4,AGO2	1	0	0	0	0	1	1	4
MIMAT0003150	hsa-miR-455-5p	ENSG00000092199	HNRNPC	protein_coding	chr14	21679277	21679282	21679277	21679282	-	24	0	AGO1,AGO1-4,AGO2	1	0	0	0	0	0	0	8
MIMAT0003150	hsa-miR-455-5p	ENSG00000092199	HNRNPC	protein_coding	chr14	21679375	21679381	21679375	21679396	-	10	0	AGO1-4,AGO2	0	0	0	0	1	0	1	8
MIMAT0003161	hsa-miR-493-3p	ENSG00000092199	HNRNPC	protein_coding	chr14	21678258	21678263	21678258	21678263	-	3	0	AGO1-4,AGO2	1	0	0	0	0	0	0	4
MIMAT0003215	hsa-miR-552-3p	ENSG00000092199	HNRNPC	protein_coding	chr14	21677552	21677557	21677552	21677557	-	1	0	AGO2	1	0	0	0	0	0	0	4
MIMAT0003220	hsa-miR-556-5p	ENSG00000092199	HNRNPC	protein_coding	chr14	21677646	21677653	21677646	21677653	-	3	0	AGO1-4,AGO2	1	0	0	0	0	0	0	1
MIMAT0003241	hsa-miR-576-5p	ENSG00000092199	HNRNPC	protein_coding	chr14	21678956	21678963	21678956	21678963	-	4	0	AGO1-4,AGO2	1	0	0	0	0	0	0	3
MIMAT0003244	hsa-miR-579-3p	ENSG00000092199	HNRNPC	protein_coding	chr14	21678127	21678134	21678127	21678134	-	15	0	AGO1,AGO1-4,AGO2	1	0	0	0	0	0	0	0
MIMAT0003247	hsa-miR-582-5p	ENSG00000092199	HNRNPC	protein_coding	chr14	21677468	21677473	21677468	21677473	-	1	0	AGO2	1	0	0	0	0	0	0	7
MIMAT0003267	hsa-miR-599	ENSG00000092199	HNRNPC	protein_coding	chr14	21677917	21677922	21677917	21677922	-	8	0	AGO1,AGO1-4,AGO2	1	0	0	0	0	0	0	1
MIMAT0003267	hsa-miR-599	ENSG00000092199	HNRNPC	protein_coding	chr14	21678574	21678579	21678574	21678579	-	4	0	AGO1,AGO2	1	0	0	0	0	0	0	1
MIMAT0003267	hsa-miR-599	ENSG00000092199	HNRNPC	protein_coding	chr14	21678903	21678908	21678903	21678908	-	5	0	AGO1,AGO1-4,AGO2	1	0	0	0	0	0	0	1
MIMAT0003289	hsa-miR-620	ENSG00000092199	HNRNPC	protein_coding	chr14	21679083	21679090	21679083	21679090	-	4	0	AGO1,AGO1-4	1	0	0	0	0	0	0	0
MIMAT0003301	hsa-miR-33b-5p	ENSG00000092199	HNRNPC	protein_coding	chr14	21678622	21678627	21678622	21678627	-	1	0	AGO2	1	0	0	0	0	0	0	7
MIMAT0003301	hsa-miR-33b-5p	ENSG00000092199	HNRNPC	protein_coding	chr14	21678857	21678862	21678857	21678862	-	1	0	AGO1-4	1	0	0	0	0	0	0	7
MIMAT0003327	hsa-miR-449b-5p	ENSG00000092199	HNRNPC	protein_coding	chr14	21678182	21678187	21678182	21678187	-	10	0	AGO1,AGO1-4,AGO2	1	0	0	0	0	0	0	2
MIMAT0003328	hsa-miR-653-5p	ENSG00000092199	HNRNPC	protein_coding	chr14	21678906	21678912	21678905	21678933	-	7	0	AGO1,AGO1-4,AGO2	1	0	0	1	1	0	0	7
MIMAT0003329	hsa-miR-411-5p	ENSG00000092199	HNRNPC	protein_coding	chr14	21677483	21677489	21677482	21677504	-	1	0	AGO2	1	0	1	0	1	0	0	4
MIMAT0003332	hsa-miR-656-3p	ENSG00000092199	HNRNPC	protein_coding	chr14	21677545	21677550	21677545	21677550	-	1	0	AGO2	1	0	0	0	0	0	0	9
MIMAT0003880	hsa-miR-671-5p	ENSG00000092199	HNRNPC	protein_coding	chr14	21679016	21679021	21679016	21679021	-	1	0	AGO1-4	1	0	0	0	0	0	0	7
MIMAT0003886	hsa-miR-769-5p	ENSG00000092199	HNRNPC	protein_coding	chr14	21733159	21733178	21733159	21733178	-	1	0	AGO1-4	0	1	0	0	0	0	0	3
MIMAT0004593	hsa-miR-130a-5p	ENSG00000092199	HNRNPC	protein_coding	chr14	21677651	21677679	21677651	21677679	-	4	0	AGO1-4,AGO2	0	0	0	1	0	0	0	1
MIMAT0004593	hsa-miR-130a-5p	ENSG00000092199	HNRNPC	protein_coding	chr14	21679653	21679681	21679653	21679681	-	12	0	AGO1,AGO1-4,AGO2	0	0	0	1	0	0	0	1
MIMAT0004597	hsa-miR-140-3p	ENSG00000092199	HNRNPC	protein_coding	chr14	21678427	21678432	21678427	21678432	-	2	0	AGO1-4,AGO2	1	0	0	0	0	0	0	10
MIMAT0004679	hsa-miR-296-3p	ENSG00000092199	HNRNPC	protein_coding	chr14	21678700	21678721	21678700	21678721	-	2	0	AGO1-4,AGO2	0	0	0	0	1	0	0	2
MIMAT0004683	hsa-miR-362-3p	ENSG00000092199	HNRNPC	protein_coding	chr14	21678946	21678951	21678946	21678951	-	5	0	AGO1-4,AGO2	1	0	0	0	0	0	0	9
MIMAT0004687	hsa-miR-371a-5p	ENSG00000092199	HNRNPC	protein_coding	chr14	21678962	21678967	21678962	21678967	-	2	0	AGO1-4,AGO2	1	0	0	0	0	0	0	0
MIMAT0004692	hsa-miR-340-5p	ENSG00000092199	HNRNPC	protein_coding	chr14	21677375	21677380	21677375	21677380	-	1	0	AGO1	1	0	0	0	0	0	0	5
MIMAT0004692	hsa-miR-340-5p	ENSG00000092199	HNRNPC	protein_coding	chr14	21677971	21677978	21677971	21677978	-	5	0	AGO1-4,AGO2	1	0	0	0	0	0	0	5
MIMAT0004692	hsa-miR-340-5p	ENSG00000092199	HNRNPC	protein_coding	chr14	21678273	21678278	21678273	21678278	-	7	0	AGO1,AGO1-4,AGO2	1	0	0	0	0	0	0	5
MIMAT0004797	hsa-miR-582-3p	ENSG00000092199	HNRNPC	protein_coding	chr14	21678049	21678054	21678049	21678054	-	6	0	AGO1-4,AGO2	1	0	0	0	0	0	0	6
MIMAT0004797	hsa-miR-582-3p	ENSG00000092199	HNRNPC	protein_coding	chr14	21678264	21678269	21678264	21678269	-	3	0	AGO1-4,AGO2	1	0	0	0	0	0	0	6
MIMAT0004799	hsa-miR-589-5p	ENSG00000092199	HNRNPC	protein_coding	chr14	21679264	21679269	21679264	21679269	-	24	1	AGO1,AGO1-4,AGO2	1	0	0	0	0	0	0	3
MIMAT0004807	hsa-miR-624-3p	ENSG00000092199	HNRNPC	protein_coding	chr14	21679253	21679258	21679253	21679258	-	21	3	AGO1,AGO1-4,AGO2	1	0	0	0	0	0	0	0
MIMAT0004809	hsa-miR-628-5p	ENSG00000092199	HNRNPC	protein_coding	chr14	21679280	21679285	21679280	21679285	-	21	3	AGO1,AGO1-4,AGO2	1	0	0	0	0	0	0	7
MIMAT0004903	hsa-miR-300	ENSG00000092199	HNRNPC	protein_coding	chr14	21677703	21677708	21677703	21677708	-	2	0	AGO2	1	0	0	0	0	0	0	0
MIMAT0004903	hsa-miR-300	ENSG00000092199	HNRNPC	protein_coding	chr14	21678683	21678688	21678682	21678703	-	7	0	AGO1,AGO2	1	0	0	0	1	0	0	0
MIMAT0004909	hsa-miR-450b-5p	ENSG00000092199	HNRNPC	protein_coding	chr14	21679005	21679010	21679005	21679010	-	1	0	AGO1-4	1	0	0	0	0	0	0	3
MIMAT0004916	hsa-miR-888-5p	ENSG00000092199	HNRNPC	protein_coding	chr14	21678961	21678967	21678960	21678988	-	2	0	AGO1-4,AGO2	1	0	0	1	0	0	0	5
MIMAT0004916	hsa-miR-888-5p	ENSG00000092199	HNRNPC	protein_coding	chr14	21678984	21678989	21678983	21679011	-	1	0	AGO1-4	1	0	0	1	0	0	0	5
MIMAT0004921	hsa-miR-889-3p	ENSG00000092199	HNRNPC	protein_coding	chr14	21677543	21677548	21677542	21677570	-	2	0	AGO1-4,AGO2	1	0	0	1	0	0	0	4
MIMAT0004921	hsa-miR-889-3p	ENSG00000092199	HNRNPC	protein_coding	chr14	21678032	21678037	21678031	21678059	-	6	0	AGO1-4,AGO2	1	0	0	1	0	0	0	4
MIMAT0004926	hsa-miR-708-5p	ENSG00000092199	HNRNPC	protein_coding	chr14	21679186	21679191	21679185	21679206	-	18	0	AGO1,AGO1-4,AGO2	1	0	0	0	1	1	1	4
MIMAT0004945	hsa-miR-744-5p	ENSG00000092199	HNRNPC	protein_coding	chr14	21679220	21679226	21679220	21679226	-	20	0	AGO1,AGO1-4,AGO2	1	0	1	0	0	0	0	5
MIMAT0004947	hsa-miR-885-5p	ENSG00000092199	HNRNPC	protein_coding	chr14	21678315	21678320	21678315	21678320	-	2	0	AGO1-4,AGO2	1	0	0	0	0	0	0	11
MIMAT0004949	hsa-miR-877-5p	ENSG00000092199	HNRNPC	protein_coding	chr14	21678629	21678634	21678629	21678634	-	1	0	AGO2	1	0	1	0	0	0	0	3
MIMAT0004949	hsa-miR-877-5p	ENSG00000092199	HNRNPC	protein_coding	chr14	21678850	21678856	21678850	21678856	-	1	0	AGO1-4	1	0	1	0	0	0	1	3
MIMAT0004953	hsa-miR-873-5p	ENSG00000092199	HNRNPC	protein_coding	chr14	21678199	21678204	21678199	21678204	-	6	0	AGO1,AGO1-4,AGO2	1	0	1	0	0	0	0	6
MIMAT0004953	hsa-miR-873-5p	ENSG00000092199	HNRNPC	protein_coding	chr14	21678224	21678230	21678223	21678243	-	7	0	AGO1,AGO1-4,AGO2	1	0	1	0	1	0	0	6
MIMAT0004954	hsa-miR-543	ENSG00000092199	HNRNPC	protein_coding	chr14	21678151	21678157	21678150	21678171	-	15	0	AGO1,AGO1-4,AGO2	1	0	0	0	1	0	0	6
MIMAT0004955	hsa-miR-374b-5p	ENSG00000092199	HNRNPC	protein_coding	chr14	21678558	21678563	21678558	21678563	-	3	0	AGO2	1	0	0	0	0	0	0	3
MIMAT0004960	hsa-miR-208b-3p	ENSG00000092199	HNRNPC	protein_coding	chr14	21678824	21678829	21678823	21678848	-	1	0	AGO1-4	1	0	1	0	1	1	1	2
MIMAT0004960	hsa-miR-208b-3p	ENSG00000092199	HNRNPC	protein_coding	chr14	21679166	21679171	21679165	21679187	-	14	0	AGO1,AGO1-4,AGO2	1	0	1	0	1	0	0	2
MIMAT0004987	hsa-miR-944	ENSG00000092199	HNRNPC	protein_coding	chr14	21677930	21677935	21677929	21677957	-	11	0	AGO1,AGO1-4,AGO2	1	0	0	1	0	0	0	4
MIMAT0004987	hsa-miR-944	ENSG00000092199	HNRNPC	protein_coding	chr14	21678839	21678845	21678838	21678866	-	1	2	AGO1-4	1	0	0	1	0	0	0	4
MIMAT0005449	hsa-miR-523-5p	ENSG00000092199	HNRNPC	protein_coding	chr14	21678627	21678633	21678627	21678633	-	1	0	AGO2	0	0	1	0	0	0	0	0
MIMAT0005449	hsa-miR-523-5p	ENSG00000092199	HNRNPC	protein_coding	chr14	21678848	21678854	21678848	21678854	-	1	0	AGO1-4	0	0	1	0	0	0	0	0
MIMAT0005450	hsa-miR-518e-5p	ENSG00000092199	HNRNPC	protein_coding	chr14	21678627	21678633	21678627	21678633	-	1	0	AGO2	0	0	1	0	0	0	0	0
MIMAT0005450	hsa-miR-518e-5p	ENSG00000092199	HNRNPC	protein_coding	chr14	21678848	21678854	21678848	21678854	-	1	0	AGO1-4	0	0	1	0	0	0	0	0
MIMAT0005451	hsa-miR-522-5p	ENSG00000092199	HNRNPC	protein_coding	chr14	21678627	21678633	21678627	21678633	-	1	0	AGO2	0	0	1	0	0	0	0	0
MIMAT0005451	hsa-miR-522-5p	ENSG00000092199	HNRNPC	protein_coding	chr14	21678848	21678854	21678848	21678854	-	1	0	AGO1-4	0	0	1	0	0	0	0	0
MIMAT0005452	hsa-miR-519a-5p	ENSG00000092199	HNRNPC	protein_coding	chr14	21678627	21678633	21678627	21678633	-	1	0	AGO2	0	0	1	0	0	0	0	4
MIMAT0005452	hsa-miR-519a-5p	ENSG00000092199	HNRNPC	protein_coding	chr14	21678848	21678854	21678848	21678854	-	1	0	AGO1-4	0	0	1	0	0	0	0	4
MIMAT0005454	hsa-miR-519b-5p	ENSG00000092199	HNRNPC	protein_coding	chr14	21678627	21678633	21678627	21678634	-	1	0	AGO2	1	0	1	0	0	0	0	0
MIMAT0005454	hsa-miR-519b-5p	ENSG00000092199	HNRNPC	protein_coding	chr14	21678848	21678854	21678848	21678855	-	1	0	AGO1-4	1	0	1	0	0	0	0	0
MIMAT0005455	hsa-miR-520c-5p	ENSG00000092199	HNRNPC	protein_coding	chr14	21678627	21678633	21678627	21678634	-	1	0	AGO2	1	0	1	0	0	0	0	1
MIMAT0005455	hsa-miR-520c-5p	ENSG00000092199	HNRNPC	protein_coding	chr14	21678848	21678854	21678848	21678855	-	1	0	AGO1-4	1	0	1	0	0	0	0	1
MIMAT0005456	hsa-miR-518d-5p	ENSG00000092199	HNRNPC	protein_coding	chr14	21678627	21678633	21678627	21678634	-	1	0	AGO2	1	0	1	0	0	0	0	0
MIMAT0005456	hsa-miR-518d-5p	ENSG00000092199	HNRNPC	protein_coding	chr14	21678848	21678854	21678848	21678855	-	1	0	AGO1-4	1	0	1	0	0	0	0	0
MIMAT0005458	hsa-miR-1224-5p	ENSG00000092199	HNRNPC	protein_coding	chr14	21678089	21678094	21678089	21678094	-	8	0	AGO1,AGO1-4,AGO2	1	0	1	0	0	0	0	5
MIMAT0005458	hsa-miR-1224-5p	ENSG00000092199	HNRNPC	protein_coding	chr14	21678751	21678756	21678751	21678756	-	5	0	AGO1,AGO1-4,AGO2	1	0	1	0	0	0	0	5
MIMAT0005788	hsa-miR-513b-5p	ENSG00000092199	HNRNPC	protein_coding	chr14	21678782	21678787	21678781	21678809	-	2	0	AGO1-4	1	0	0	1	0	1	0	3
MIMAT0005788	hsa-miR-513b-5p	ENSG00000092199	HNRNPC	protein_coding	chr14	21678881	21678886	21678880	21678908	-	5	0	AGO1,AGO1-4,AGO2	1	0	0	1	0	1	0	3
MIMAT0005789	hsa-miR-513c-5p	ENSG00000092199	HNRNPC	protein_coding	chr14	21678165	21678170	21678165	21678170	-	6	0	AGO1-4,AGO2	1	0	0	0	0	0	0	4
MIMAT0005789	hsa-miR-513c-5p	ENSG00000092199	HNRNPC	protein_coding	chr14	21678547	21678552	21678547	21678552	-	1	0	AGO2	1	0	0	0	0	0	0	4
MIMAT0005792	hsa-miR-320b	ENSG00000092199	HNRNPC	protein_coding	chr14	21678965	21678970	21678964	21678992	-	2	0	AGO1-4,AGO2	1	0	0	1	1	1	1	4
MIMAT0005793	hsa-miR-320c	ENSG00000092199	HNRNPC	protein_coding	chr14	21678965	21678971	21678964	21678992	-	2	0	AGO1-4,AGO2	1	0	0	1	1	1	1	5
MIMAT0005795	hsa-miR-1323	ENSG00000092199	HNRNPC	protein_coding	chr14	21678379	21678384	21678379	21678384	-	1	0	AGO1-4	1	0	0	0	0	0	0	1
MIMAT0005795	hsa-miR-1323	ENSG00000092199	HNRNPC	protein_coding	chr14	21678394	21678399	21678394	21678399	-	1	0	AGO1-4	1	0	0	0	0	0	0	1
MIMAT0005795	hsa-miR-1323	ENSG00000092199	HNRNPC	protein_coding	chr14	21679176	21679182	21679176	21679182	-	11	0	AGO1,AGO1-4	1	0	1	0	0	0	0	1
MIMAT0005797	hsa-miR-1301-3p	ENSG00000092199	HNRNPC	protein_coding	chr14	21678321	21678328	21678321	21678328	-	2	0	AGO1-4,AGO2	1	0	0	0	0	0	0	4
MIMAT0005798	hsa-miR-1185-5p	ENSG00000092199	HNRNPC	protein_coding	chr14	21678454	21678460	21678453	21678481	-	2	0	AGO1-4,AGO2	1	0	1	1	0	0	0	5
MIMAT0005798	hsa-miR-1185-5p	ENSG00000092199	HNRNPC	protein_coding	chr14	21678852	21678857	21678851	21678879	-	1	2	AGO1-4	1	0	1	1	0	0	0	5
MIMAT0005798	hsa-miR-1185-5p	ENSG00000092199	HNRNPC	protein_coding	chr14	21679299	21679304	21679298	21679326	-	14	5	AGO1,AGO1-4	1	0	1	1	0	0	0	5
MIMAT0005800	hsa-miR-1298-5p	ENSG00000092199	HNRNPC	protein_coding	chr14	21678877	21678882	21678877	21678882	-	1	0	AGO1-4	1	0	0	0	0	0	0	2
MIMAT0005878	hsa-miR-1287-5p	ENSG00000092199	HNRNPC	protein_coding	chr14	21677955	21677960	21677955	21677960	-	6	0	AGO1-4,AGO2	1	0	1	0	0	0	0	3
MIMAT0005878	hsa-miR-1287-5p	ENSG00000092199	HNRNPC	protein_coding	chr14	21678422	21678427	21678422	21678429	-	2	0	AGO1-4,AGO2	1	0	1	0	0	0	0	3
MIMAT0005884	hsa-miR-1294	ENSG00000092199	HNRNPC	protein_coding	chr14	21678935	21678940	21678935	21678940	-	5	0	AGO1-4,AGO2	1	0	0	0	0	0	0	3
MIMAT0005886	hsa-miR-1297	ENSG00000092199	HNRNPC	protein_coding	chr14	21677672	21677677	21677672	21677677	-	2	0	AGO2	1	0	0	0	0	0	0	0
MIMAT0005919	hsa-miR-548o-3p	ENSG00000092199	HNRNPC	protein_coding	chr14	21678379	21678384	21678379	21678384	-	1	0	AGO1-4	1	0	0	0	0	0	0	0
MIMAT0005919	hsa-miR-548o-3p	ENSG00000092199	HNRNPC	protein_coding	chr14	21678394	21678399	21678394	21678399	-	1	0	AGO1-4	1	0	0	0	0	0	0	0
MIMAT0005919	hsa-miR-548o-3p	ENSG00000092199	HNRNPC	protein_coding	chr14	21679176	21679182	21679176	21679182	-	11	0	AGO1,AGO1-4	1	0	1	0	0	0	0	0
MIMAT0005923	hsa-miR-1269a	ENSG00000092199	HNRNPC	protein_coding	chr14	21677499	21677506	21677499	21677506	-	1	0	AGO2	1	0	0	0	0	0	0	3
MIMAT0005924	hsa-miR-1270	ENSG00000092199	HNRNPC	protein_coding	chr14	21679083	21679090	21679083	21679090	-	4	0	AGO1,AGO1-4	1	0	0	0	0	0	0	3
MIMAT0005930	hsa-miR-1276	ENSG00000092199	HNRNPC	protein_coding	chr14	21679130	21679135	21679129	21679157	-	11	0	AGO1,AGO1-4,AGO2	1	0	0	1	0	0	0	0
MIMAT0005944	hsa-miR-1252-5p	ENSG00000092199	HNRNPC	protein_coding	chr14	21679248	21679253	21679248	21679253	-	22	1	AGO1,AGO1-4,AGO2	1	0	0	0	0	0	0	1
MIMAT0005952	hsa-miR-1321	ENSG00000092199	HNRNPC	protein_coding	chr14	21677456	21677461	21677456	21677461	-	2	0	AGO2	1	0	0	0	0	0	0	1
MIMAT0005952	hsa-miR-1321	ENSG00000092199	HNRNPC	protein_coding	chr14	21737466	21737484	21737466	21737484	-	5	1	AGO1,AGO1-4	0	1	0	0	0	0	0	1
MIMAT0005955	hsa-miR-1197	ENSG00000092199	HNRNPC	protein_coding	chr14	21679250	21679255	21679250	21679255	-	22	0	AGO1,AGO1-4,AGO2	1	0	0	0	0	0	0	2
MIMAT0006764	hsa-miR-320d	ENSG00000092199	HNRNPC	protein_coding	chr14	21678965	21678970	21678964	21678992	-	2	0	AGO1-4,AGO2	1	0	0	1	1	1	1	2
MIMAT0007888	hsa-miR-1913	ENSG00000092199	HNRNPC	protein_coding	chr14	21678913	21678919	21678913	21678919	-	6	0	AGO1,AGO1-4,AGO2	0	0	1	0	0	0	0	4
MIMAT0010251	hsa-miR-449c-5p	ENSG00000092199	HNRNPC	protein_coding	chr14	21678181	21678187	21678181	21678187	-	10	0	AGO1,AGO1-4,AGO2	0	0	1	0	0	0	0	3
MIMAT0010251	hsa-miR-449c-5p	ENSG00000092199	HNRNPC	protein_coding	chr14	21678447	21678452	21678447	21678452	-	2	0	AGO1-4,AGO2	0	0	1	0	0	0	0	3
MIMAT0011157	hsa-miR-2114-3p	ENSG00000092199	HNRNPC	protein_coding	chr14	21678359	21678365	21678359	21678365	-	2	0	AGO1-4,AGO2	0	0	1	0	0	0	0	9
MIMAT0013517	hsa-miR-2682-5p	ENSG00000092199	HNRNPC	protein_coding	chr14	21678181	21678187	21678181	21678187	-	10	0	AGO1,AGO1-4,AGO2	0	0	1	0	0	0	0	3
MIMAT0013517	hsa-miR-2682-5p	ENSG00000092199	HNRNPC	protein_coding	chr14	21678447	21678452	21678447	21678452	-	2	0	AGO1-4,AGO2	0	0	1	0	0	0	0	3
MIMAT0015007	hsa-miR-3139	ENSG00000092199	HNRNPC	protein_coding	chr14	21679185	21679191	21679185	21679213	-	19	0	AGO1,AGO1-4,AGO2	0	0	0	1	0	1	1	2
MIMAT0015023	hsa-miR-3150a-3p	ENSG00000092199	HNRNPC	protein_coding	chr14	21679260	21679266	21679259	21679287	-	25	4	AGO1,AGO1-4,AGO2	0	0	1	1	0	0	0	0
MIMAT0015023	hsa-miR-3150a-3p	ENSG00000092199	HNRNPC	protein_coding	chr14	21731148	21731171	21731148	21731171	-	4	0	AGO1-4,AGO2	0	1	0	0	0	0	0	0
MIMAT0015037	hsa-miR-3163	ENSG00000092199	HNRNPC	protein_coding	chr14	21677971	21677999	21677971	21677999	-	6	0	AGO1-4,AGO2	0	0	0	1	0	0	0	0
MIMAT0015037	hsa-miR-3163	ENSG00000092199	HNRNPC	protein_coding	chr14	21678690	21678705	21678677	21678718	-	8	0	AGO1,AGO2	0	0	0	2	0	0	0	0
MIMAT0015037	hsa-miR-3163	ENSG00000092199	HNRNPC	protein_coding	chr14	21679094	21679122	21679094	21679122	-	11	0	AGO1,AGO1-4,AGO2	0	0	0	1	0	0	0	0
MIMAT0015049	hsa-miR-1193	ENSG00000092199	HNRNPC	protein_coding	chr14	21679257	21679262	21679257	21679262	-	23	2	AGO1,AGO1-4,AGO2	0	0	1	0	0	0	0	3
MIMAT0015088	hsa-miR-514b-3p	ENSG00000092199	HNRNPC	protein_coding	chr14	21678861	21678867	21678861	21678867	-	1	2	AGO1-4	0	0	0	0	0	1	0	4
MIMAT0016925	hsa-miR-500b-5p	ENSG00000092199	HNRNPC	protein_coding	chr14	21679108	21679113	21679107	21679135	-	12	0	AGO1,AGO1-4,AGO2	0	0	1	1	0	0	0	5
MIMAT0016925	hsa-miR-500b-5p	ENSG00000092199	HNRNPC	protein_coding	chr14	21679448	21679454	21679447	21679475	-	7	4	AGO1,AGO1-4,AGO2	0	0	1	1	0	0	1	5
MIMAT0017352	hsa-miR-2277-5p	ENSG00000092199	HNRNPC	protein_coding	chr14	21679218	21679224	21679218	21679224	-	20	0	AGO1,AGO1-4,AGO2	0	0	1	0	0	0	0	1
MIMAT0017981	hsa-miR-3605-5p	ENSG00000092199	HNRNPC	protein_coding	chr14	21678454	21678459	21678453	21678481	-	2	0	AGO1-4,AGO2	0	0	1	1	0	0	0	3
MIMAT0017981	hsa-miR-3605-5p	ENSG00000092199	HNRNPC	protein_coding	chr14	21678852	21678858	21678851	21678879	-	1	2	AGO1-4	0	0	1	1	0	0	0	3
MIMAT0017981	hsa-miR-3605-5p	ENSG00000092199	HNRNPC	protein_coding	chr14	21679299	21679304	21679298	21679326	-	14	5	AGO1,AGO1-4	0	0	1	1	0	0	0	3
MIMAT0018104	hsa-miR-3679-5p	ENSG00000092199	HNRNPC	protein_coding	chr14	21678454	21678460	21678453	21678481	-	2	0	AGO1-4,AGO2	0	0	1	1	0	0	0	6
MIMAT0018104	hsa-miR-3679-5p	ENSG00000092199	HNRNPC	protein_coding	chr14	21678852	21678857	21678851	21678879	-	1	2	AGO1-4	0	0	1	1	0	0	0	6
MIMAT0018104	hsa-miR-3679-5p	ENSG00000092199	HNRNPC	protein_coding	chr14	21679299	21679304	21679298	21679326	-	14	5	AGO1,AGO1-4	0	0	1	1	0	0	0	6
MIMAT0018944	hsa-miR-4429	ENSG00000092199	HNRNPC	protein_coding	chr14	21678965	21678970	21678964	21678992	-	2	0	AGO1-4,AGO2	0	0	0	1	0	1	1	0
MIMAT0018980	hsa-miR-4458	ENSG00000092199	HNRNPC	protein_coding	chr14	21678005	21678010	21678004	21678032	-	6	0	AGO1-4,AGO2	0	0	1	1	0	0	0	1
MIMAT0018980	hsa-miR-4458	ENSG00000092199	HNRNPC	protein_coding	chr14	21678234	21678239	21678233	21678261	-	6	0	AGO1,AGO1-4,AGO2	0	0	1	1	0	0	0	1
MIMAT0018980	hsa-miR-4458	ENSG00000092199	HNRNPC	protein_coding	chr14	21679133	21679138	21679132	21679160	-	11	0	AGO1,AGO1-4,AGO2	0	0	1	1	0	0	0	1
MIMAT0019036	hsa-miR-4500	ENSG00000092199	HNRNPC	protein_coding	chr14	21678005	21678010	21678005	21678010	-	5	0	AGO1-4,AGO2	0	0	1	0	0	0	0	0
MIMAT0019036	hsa-miR-4500	ENSG00000092199	HNRNPC	protein_coding	chr14	21678234	21678239	21678234	21678239	-	6	0	AGO1,AGO1-4,AGO2	0	0	1	0	0	0	0	0
MIMAT0019036	hsa-miR-4500	ENSG00000092199	HNRNPC	protein_coding	chr14	21679133	21679138	21679133	21679138	-	10	0	AGO1,AGO1-4,AGO2	0	0	1	0	0	0	0	0
MIMAT0019218	hsa-miR-3194-3p	ENSG00000092199	HNRNPC	protein_coding	chr14	21679687	21679709	21679687	21679709	-	7	0	AGO1,AGO1-4,AGO2	0	1	0	0	0	0	0	2
MIMAT0019704	hsa-miR-4644	ENSG00000092199	HNRNPC	protein_coding	chr14	21677458	21677463	21677458	21677463	-	1	0	AGO2	0	0	1	0	0	0	0	0
MIMAT0019704	hsa-miR-4644	ENSG00000092199	HNRNPC	protein_coding	chr14	21679296	21679301	21679296	21679301	-	15	5	AGO1,AGO1-4	0	0	1	0	0	0	0	0
MIMAT0019761	hsa-miR-4677-3p	ENSG00000092199	HNRNPC	protein_coding	chr14	21679466	21679472	21679466	21679472	-	4	1	AGO1,AGO1-4,AGO2	0	0	1	0	0	0	0	1
MIMAT0019776	hsa-miR-1343-3p	ENSG00000092199	HNRNPC	protein_coding	chr14	21678722	21678728	21678722	21678728	-	3	0	AGO1,AGO1-4,AGO2	0	0	0	0	0	1	0	2
MIMAT0019924	hsa-miR-4770	ENSG00000092199	HNRNPC	protein_coding	chr14	21677334	21677340	21677334	21677340	-	2	0	AGO2	0	0	1	0	0	0	0	6
MIMAT0021127	hsa-miR-5195-3p	ENSG00000092199	HNRNPC	protein_coding	chr14	21677598	21677604	21677598	21677604	-	9	0	AGO1-4,AGO2	0	0	1	0	0	0	0	1
MIMAT0022479	hsa-miR-5688	ENSG00000092199	HNRNPC	protein_coding	chr14	21678291	21678319	21678291	21678319	-	6	0	AGO1,AGO1-4,AGO2	0	0	0	1	0	0	0	0
MIMAT0022479	hsa-miR-5688	ENSG00000092199	HNRNPC	protein_coding	chr14	21678654	21678682	21678654	21678682	-	8	0	AGO1,AGO2	0	0	0	1	0	0	0	0
MIMAT0022479	hsa-miR-5688	ENSG00000092199	HNRNPC	protein_coding	chr14	21678814	21678842	21678814	21678842	-	1	0	AGO1-4	0	0	0	1	0	0	0	0
MIMAT0022479	hsa-miR-5688	ENSG00000092199	HNRNPC	protein_coding	chr14	21679173	21679201	21679173	21679201	-	18	0	AGO1,AGO1-4,AGO2	0	0	0	1	0	0	0	0
MIMAT0022483	hsa-miR-5691	ENSG00000092199	HNRNPC	protein_coding	chr14	21677446	21677452	21677446	21677452	-	2	0	AGO2	0	0	1	0	0	0	0	5
MIMAT0022483	hsa-miR-5691	ENSG00000092199	HNRNPC	protein_coding	chr14	21679686	21679705	21679686	21679705	-	7	0	AGO1,AGO1-4,AGO2	0	1	0	0	0	0	0	5
MIMAT0022724	hsa-miR-1277-5p	ENSG00000092199	HNRNPC	protein_coding	chr14	21677345	21677373	21677345	21677373	-	2	0	AGO1,AGO2	0	0	0	1	0	0	0	1
MIMAT0022724	hsa-miR-1277-5p	ENSG00000092199	HNRNPC	protein_coding	chr14	21678032	21678060	21678032	21678060	-	6	0	AGO1-4,AGO2	0	0	0	1	0	0	0	1
MIMAT0022724	hsa-miR-1277-5p	ENSG00000092199	HNRNPC	protein_coding	chr14	21678555	21678583	21678555	21678583	-	4	0	AGO1,AGO2	0	0	0	1	0	0	0	1
MIMAT0022724	hsa-miR-1277-5p	ENSG00000092199	HNRNPC	protein_coding	chr14	21678610	21678638	21678610	21678638	-	3	0	AGO1,AGO2	0	0	0	1	0	0	0	1
MIMAT0023713	hsa-miR-6088	ENSG00000092199	HNRNPC	protein_coding	chr14	21677334	21677340	21677334	21677340	-	2	0	AGO2	0	0	1	0	0	0	0	1
MIMAT0026640	hsa-miR-670-3p	ENSG00000092199	HNRNPC	protein_coding	chr14	21679427	21679433	21679427	21679433	-	7	1	AGO1,AGO1-4	0	0	0	0	0	0	1	2
